# Supplementary material for: Two-State Co-Expression Network Analysis to Identify Genes Related to Salt Tolerance in Thai Rice
Source: MDPI journal article supplement (doi:10.3390/genes9120594), 2018-11-29

## Seedling stage

### Molecular Functions

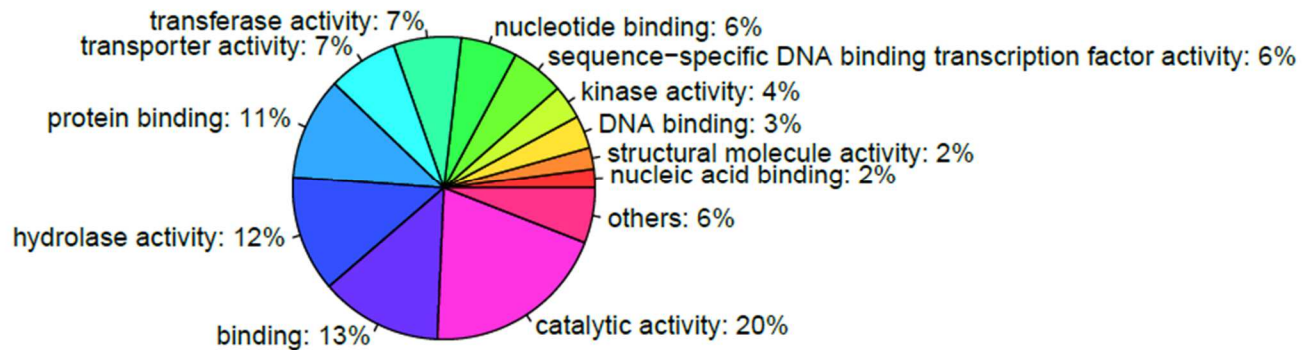

### Cellular Components

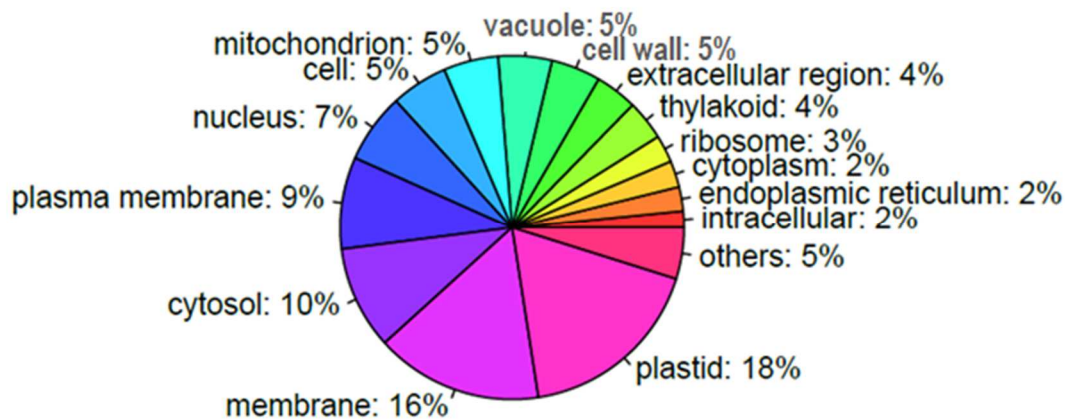

### Biological Processes

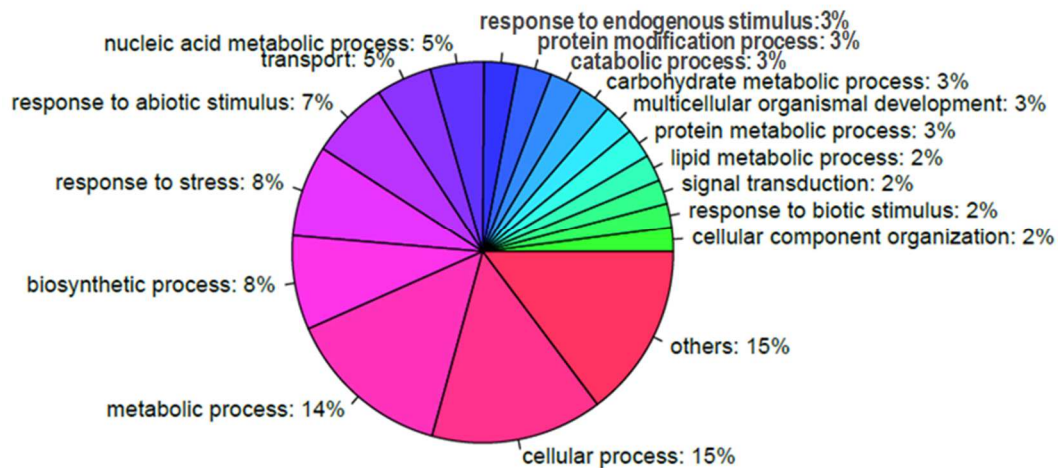

## Booting stage

### Molecular Functions

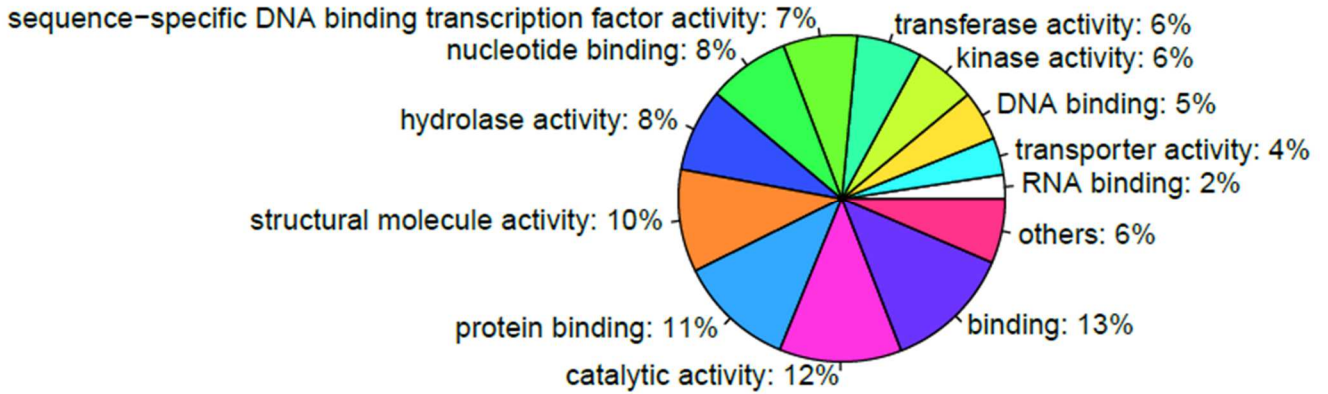

### Cellular Components

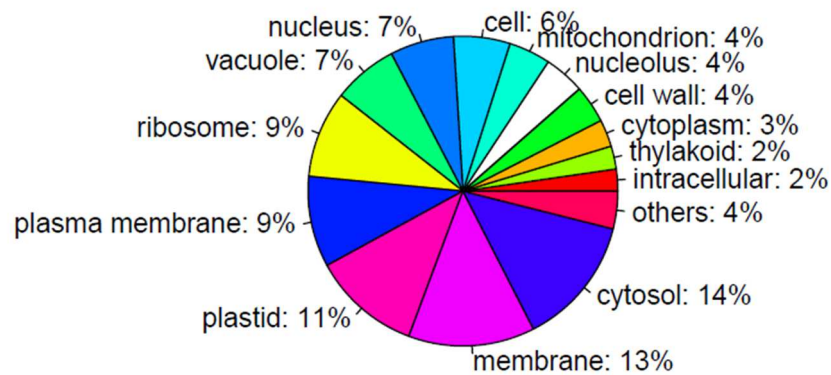

### Biological Processes

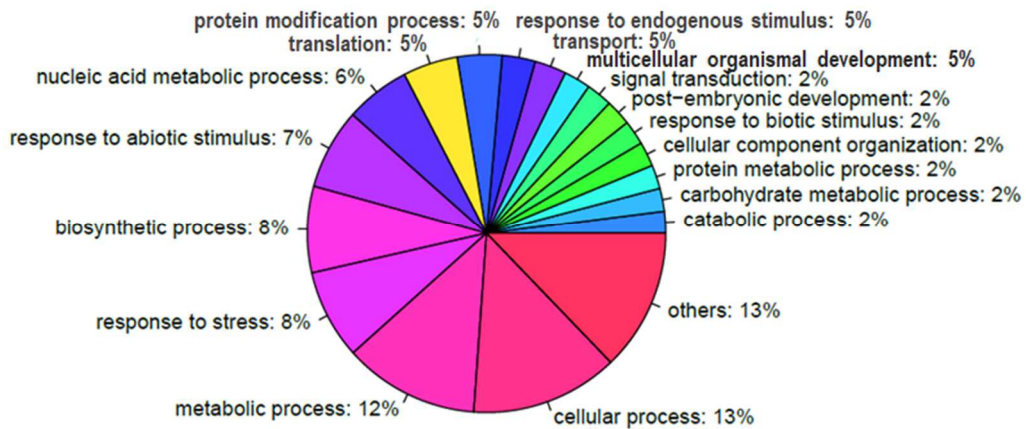

Supplement: s1 [file s1]
